# Supplementary material
Source: Springer Nature journal article supplement (https://www.springermedizin.de/resource/supplementary/12891_2009_726_MOESM4_ESM.pdf/9506270)

# IGFBP-5

## A

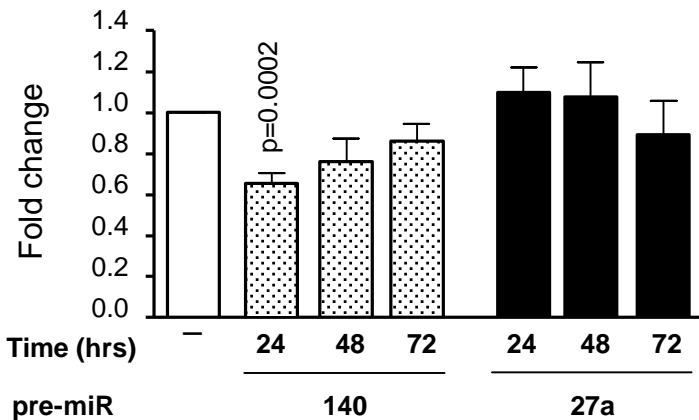

## B

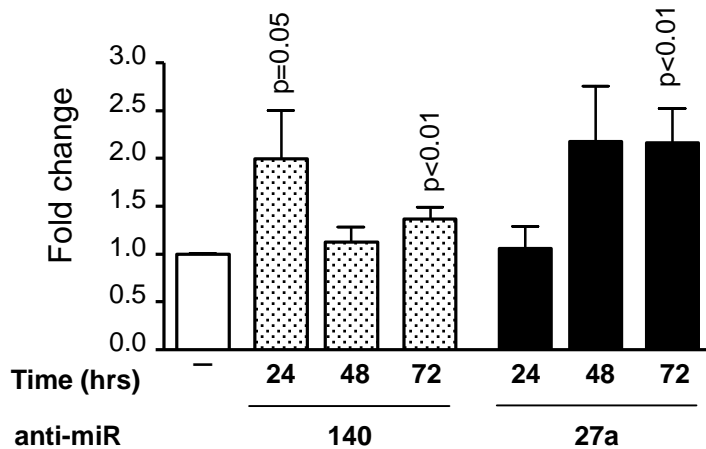

Supplement: MOESM4 [file 9506270]
